# Supplementary material for: Negative Control of Cell Migration by Rac1b in Highly Metastatic Pancreatic Cancer Cells Is Mediated by Sequential Induction of Nonactivated Smad3 and Biglycan
Source: Cancers (Basel). 2019 Dec 6;11(12):1959. doi: 10.3390/cancers11121959 (PMC6966648; doi:10.3390/cancers11121959)
Supplement: Supplementary file 1 [file cancers-11-01959-s001.pdf]

# Supplementary Materials: Negative Control of Cell Migration by Rac1b in Highly Metastatic Pancreatic Cancer Cells Is Mediated by Sequential Induction of Non-Activated Smad3 and Biglycan

Hannah Otterbein, Hendrik Lehnert and Hendrik Ungefroren

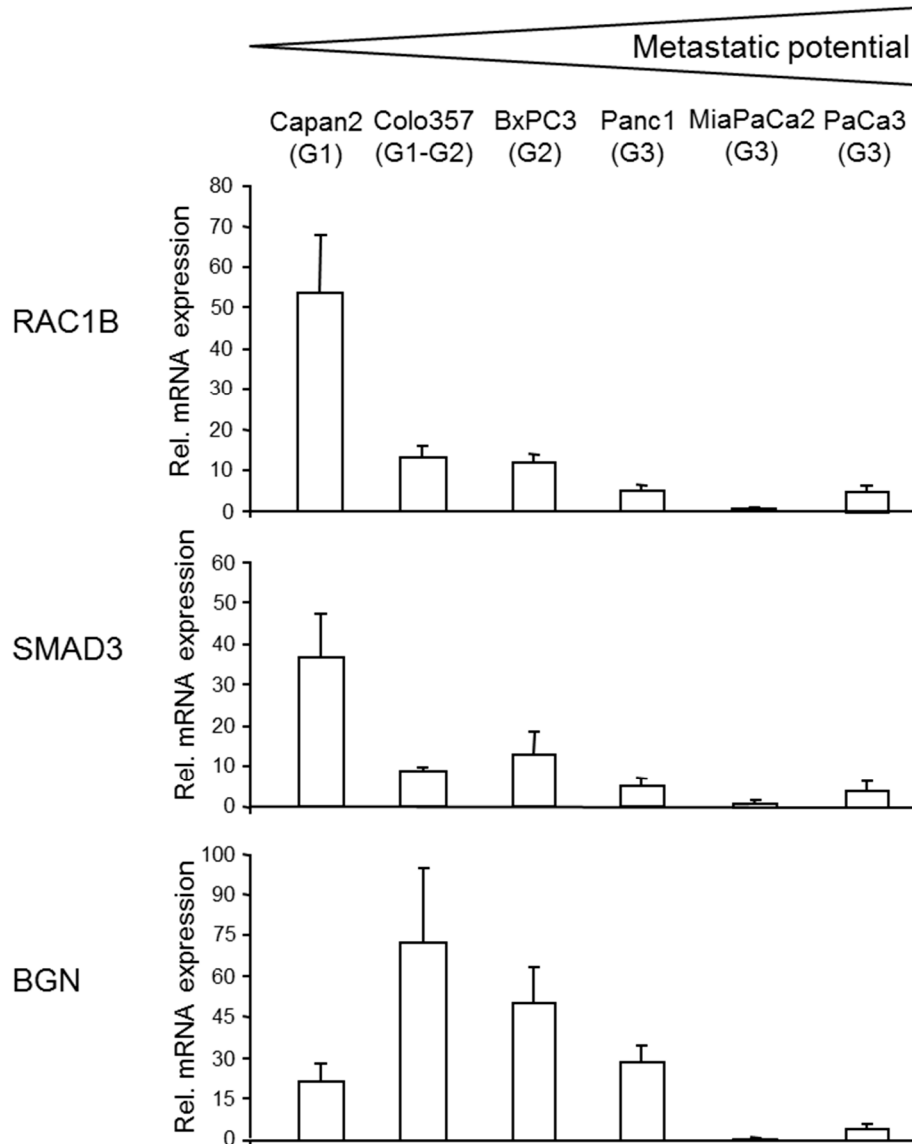

**Figure S1.** QPCR-based quantification of RAC1B, SMAD3, and BGN mRNA expression in the indicated PDAC-derived cell lines. Shown are the means  $\pm$  SD from 3–4 preparations after normalization to GAPDH and TBP.

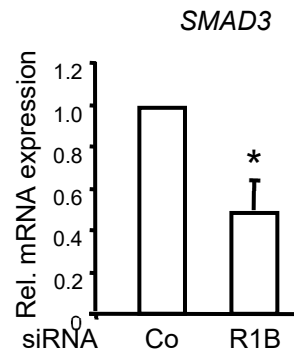

**Figure S2.** Knockdown of *RAC1B* is associated with downregulation of SMAD3 expression in PaCa3 cells. PaCa3-*RAC1B*-KD cells were generated by transient transfection with 50 nM of either irrelevant control siRNA (Co) or *RAC1B* siRNA (R1B) as outlined in the Methods section. 48 h after transfection cells were lysed and processed for RNA isolation, reverse transcription and qPCR for SMAD3. Shown are the means  $\pm$  SD calculated from three transfection experiments after normalization of control cells to 1.0. The asterisk (\*) indicates significance (Wilcoxon-test).

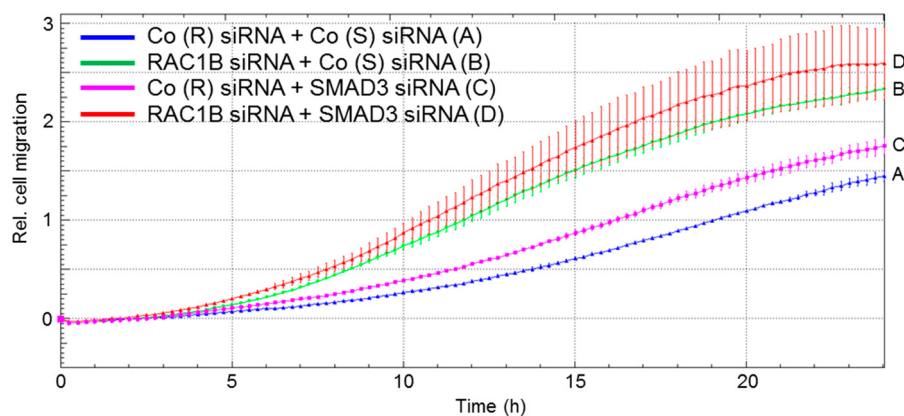

**Figure S3.** Effect of knockdown of *RAC1B*, SMAD3, or combined knockdown of *RAC1B* and SMAD3 on migratory activity in PaCa3 cells. PaCa3 cells were transiently transfected with control (Co) siRNA, *RAC1B* siRNA, SMAD3 siRNA, or *RAC1B* siRNA + SMAD3 siRNA as described in Material and Methods and 48 h later subjected to real-time cell migration assay. Shown are the mean  $\pm$  SD from 4 wells processed in parallel. Differences between cells transfected with Co siRNA (blue curve, tracing A) and *RAC1B* siRNA (green curve, tracing B), SMAD3 siRNA (magenta curve, tracing C) or *RAC1B* siRNA + SMAD3 siRNA (red curve, tracing D) are first significant at 06:30, 11:00, or 05:30, respectively, and all later time points ( $p < 0.05$ , Mann-Whitney-U-test).

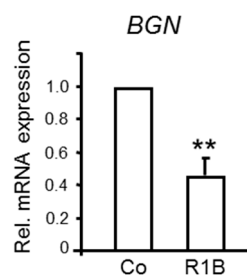

**Figure S4.** Knockdown of *RAC1B* is associated with downregulation of BGN expression in PaCa3 cells. Panc1-*RAC1B*-KD cells were generated by transient transfection of Panc1 cells with 50 nM of either irrelevant control siRNA (Co) or *RAC1B* siRNA (R1B) as outlined in the Methods section. 48 h after transfection cells were lysed and processed for RNA isolation, reverse transcription and qPCR for BGN. Shown are the means  $\pm$  SD calculated from three experiments following normalization of control cells to 1.0. The asterisks (\*\*) indicate significance (Wilcoxon-test).

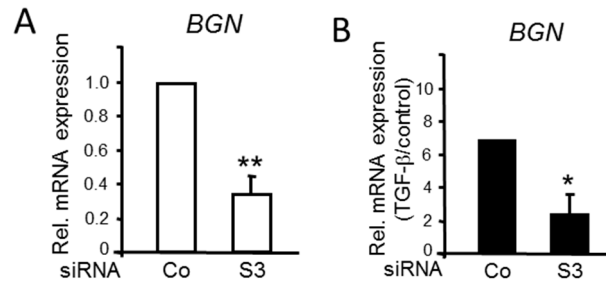

**Figure S5.** Knockdown of *SMAD3* is associated with downregulation of basal and TGF- $\beta$ -induced BGN expression in PaCa3 cells. **(A).** Knockdown of *SMAD3* is associated with downregulation of basal BGN expression in PaCa3 cells. PaCa3-RAC1B-KD cells were generated by transient transfection with 50 nM of either irrelevant control siRNA (Co) or *SMAD3* siRNA (S3) as outlined in the Methods section. 48 h after transfection cells were lysed and processed for RNA isolation, reverse transcription and qPCR for BGN. Shown are the means  $\pm$  SD calculated from three experiments after normalization of control cells to 1.0. The asterisks (\*\*) indicate significance (Wilcoxon-test). **(B).** Knockdown of *SMAD3* is associated with downregulation of TGF- $\beta$ -induced BGN expression in PaCa3 cells. PaCa3 cells were transiently transfected with 50 nM of either irrelevant control siRNA (Co) or *SMAD3* siRNA (S3) as outlined in the Methods section. Following treatment of the cells with TGF- $\beta$ 1 for 24 h, BGN mRNA expression was determined by qPCR analysis. Shown are the means  $\pm$  SD calculated from three transfection experiments following normalization of control cells to 1.0. The asterisk (\*) indicates significance (Wilcoxon-test).

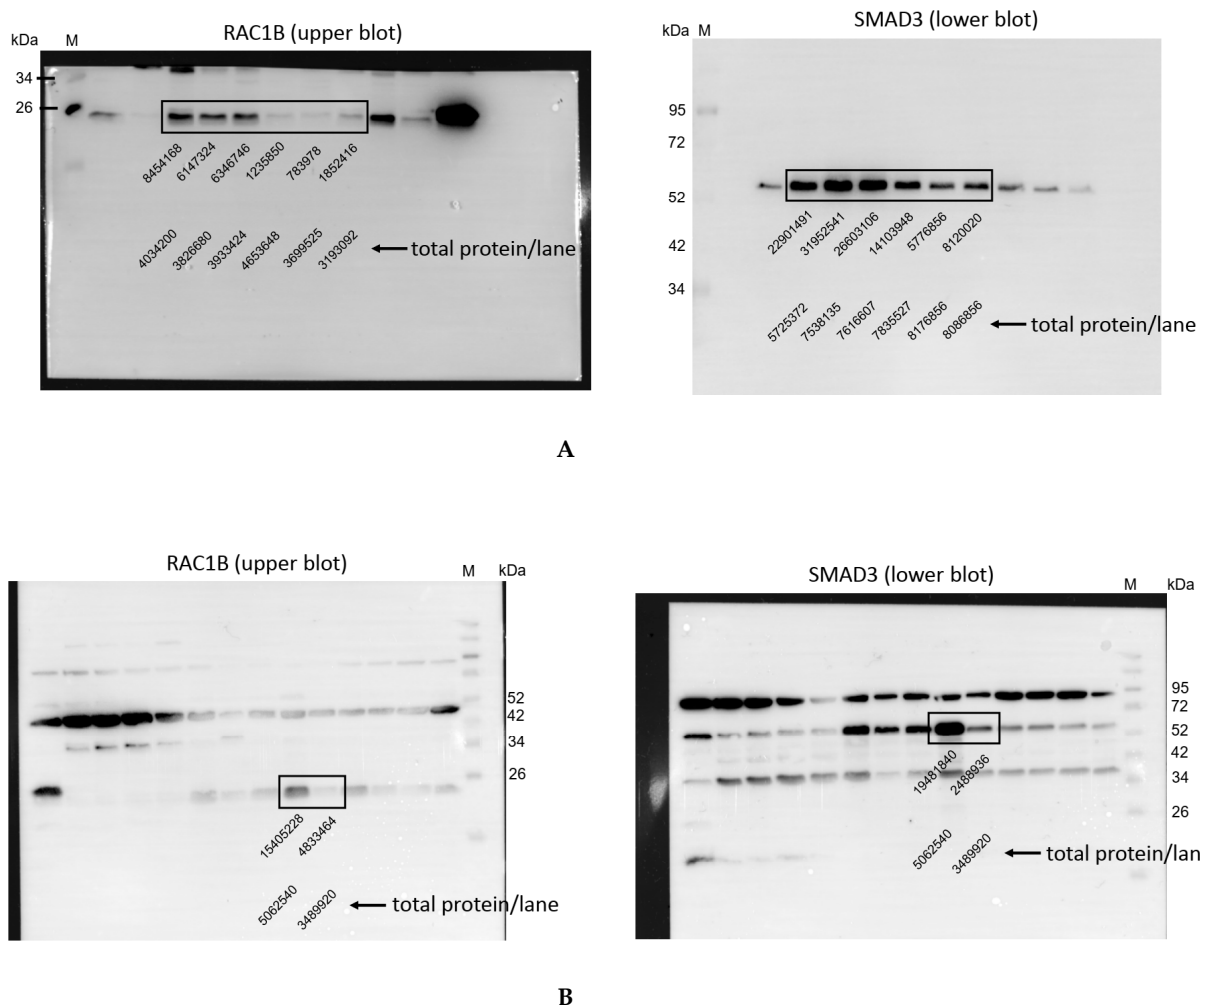

**Figure S6.** Uncropped immunoblots and molecular weight markers from Figure 1.

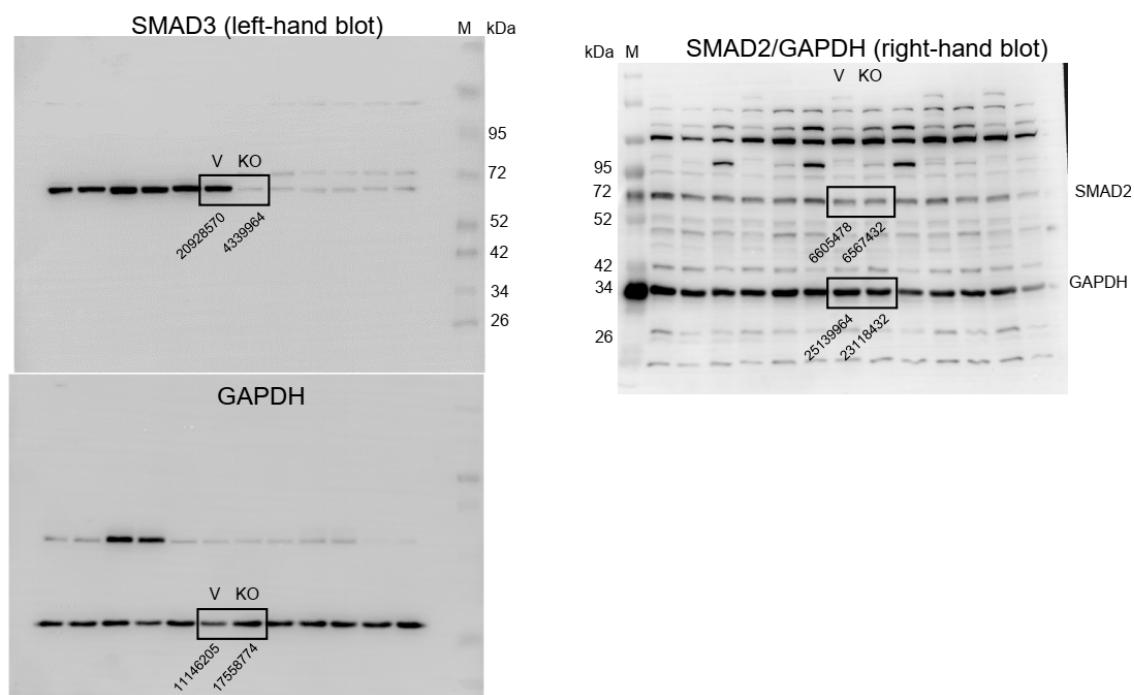

B

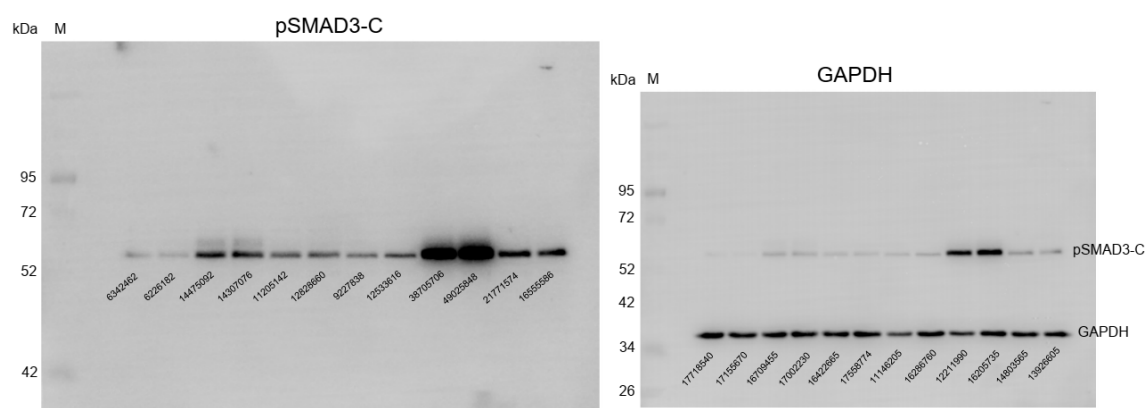

C

**Figure S7.** Uncropped immunoblots and molecular weight markers from Figure 2.

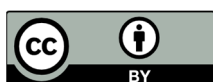

© 2019 by the authors. Licensee MDPI, Basel, Switzerland. This article is an open access article distributed under the terms and conditions of the Creative Commons Attribution (CC BY) license (<http://creativecommons.org/licenses/by/4.0/>).
